# Supplementary material for: Negative Attributions as a Source of Vulnerability for trauma-related Shame and PTSD Symptoms
Source: Springer Nature journal article supplement (doi:10.1007/s10942-022-00481-z), 2022-10-19
Supplement: MOESM1 [file 23622328]

**Supplementary Material 1**

Our primary mediation model indicated that shame mediates the relationship between trauma-related causal attributions and PTSD. On the basis that internal, stable and global attributions are also a cognitive vulnerability to depression, we assessed the potential mediating effect of both depression and shame on trauma-related causal attributions and PTSD, in a parallel mediation model (PROCESS Model 6; Hayes, 2013). The parallel model tests the role of each mediation while accounting for shared variation between mediators. Although mediators may be correlated, the causal relationship between them is not considered in this model. The interested reader is referred to Supplementary Figure 1. After the mediators (depression and shame) were included in the model, the direct effect between Trauma related causal attributions fell to non-significance. All indirect effects were significantly different from zero.

Figure 1. Parallel Mediation model

**PTSD Symptom Severity**

**Trauma-related causal attributions**

**(Negative Attributions)**

**Trauma
related shame**

**Depression**

*b*(β) = 2.09 (.35), *SE* = .86
95% CI [.39 to 3.80]*

*b*(β) = 6.22 (.27), *SE* = 2.36
95% CI [1.52 to 10.92]*

9

c’: *b*(β) = 2.54 (.15), *SE* = 1.30
95% CI [-.04 to 5.11]

9

c: *b*(β) = 5.73 (.34), *SE* = 1.70
95% CI [2.36 to 9.10]*

9

*b*(β) = .15 (.21), *SE* = .07
95% CI [.01 to .30]*

9

*b*(β) = 1.07 (.54), *SE* = .20
95% CI [.67 to 1.47]*

Note. *N* = 87. **p* < .05.

The significant indirect effects were obtained based on bias-corrected bootstrap confidence interval (CI) based on 5,000 bootstrap iterations. Time since trauma and Trauma Load were entered as covariates.

The total effect of negative attributions on PTSD symptom severity was significant, *F*(3,83) = 6.53, *p* <.001, with 19% of variance explained. Depression and Trauma-related shame accounted for 40% and 17% of variance of PTSD, respectively. All indirect effects were significantly different from zero: Negative Attributions -> Depression -> PTSD, 95% CI [.43 to 4.39] and Negative Attributions -> Shame -> PTSD, 95% CI [.02 to 2.47].
